# Supplementary material
Source: ML conference proceedings conference paper supplement (https://openreview.net/forum?id=3iSj4l8ZGT)
Supplement: supplementary_material [file attachment]

## A Appendix

The appendix is structured into three main parts.

The first part (section A.1, A.2) provides additional details about SPS. Section A.1 focuses on implementation-related aspects, while section A.2 presents experimental results concerning the reconstruction and prediction loss.

The second part (section A.3 to A.5) introduces an extended version of SPS called SPS+. Section A.3 describes the capabilities of SPS+ in achieving content-style disentanglement along with interpretable learning. The related experiments are presented in section A.4 and section A.5.

The third part (section A.6) presents two additional complex experiments conducted separately using SPS+ and SPS, respectively.

### A.1 SPS implementation details

#### A.1.1 Architecture details

Our models for both tasks share the following architecture. The encoder first uses a 2D-CNN with ReLU activation to shrink the input down to an  $8 \times 8$  middle layer, and then a linear layer to obtain  $z$ . If the encoder is in a VAE (instead of an AE), two linear layers characterises the posterior, one for the mean and the other for the log-variance. The prior model is a vanilla RNN of one layer with 256 hidden units and one linear layer projection head. The decoder consists of a small fully-connected network followed by 2D transposed convolution layers mirroring the CNN in the encoder. Its output is then passed through a sigmoid function. We use no batch normalisation or dropout layers.

Minor variations exist between the models for the two tasks. In the audio task, we use three convolution layers in the encoder, with three linear and three 2D transposed convolution layers in the decoder. In the vision task, as the data are more complex, we use four convolution layers in the encoder, with four linear and four 2D transposed convolution layers in the decoder.

#### A.1.2 Training details

For both tasks, we use the Adam optimiser with learning rate  $= 10^{-3}$ . The training batch size is 32 across all of our experiments. For all VAE-based models, including SPS<sub>VAE</sub> (ours/ablation) and  $\beta$ -VAE (baseline), we set  $\beta$  (i.e.,  $\lambda_3$  in Equation (1)) to 0.01, with  $\lambda_1 = 1$  and  $\lambda_2 = 2$ . All BCE and MSE loss functions are calculated in sum instead of mean.  $K = 4$  for all SPS models except for those discussed in section 5 where we analyse the influence of different  $K$ .

The RNN predicts  $z_{n+1:T}$  given the first  $n$  embeddings  $z_{1:n}$ . We choose  $n = 3$  for the audio task and  $n = 5$  for the vision task. We adopt scheduled sampling [Bengio *et al.*, 2015] during the training stage, where we gradually reduce the guidance from teacher forcing. After around 50000 batch iterations, the RNN relies solely on the given  $z_{1:T}$  and predicts auto-regressively.

### A.2 SPS reconstruction and prior prediction results

We investigate the reconstruction and prediction capacities of our model and show that they are not harmed by adding symmetry constraints. For the music task, we compare our model, our model ablating symmetry constraints, and a  $\beta$ -VAE trained solely for the reconstruction of power spectrogram. Table 3 reports per-pixel BCE of the reconstructed sequences from the original input frames (Self-recon) and from the RNN predictions (Image-pred). We also include  $\mathcal{L}_{\text{prior}}$ , the MSE loss on the RNN-predicted  $\hat{z}$  as defined in section 3.2. The results show that our models slightly surpasses the ablation and baseline models in all three metrics.

Similarly, Table 4 displays the reconstruction and prediction losses on the test set for the video task. Results show that adding symmetry constraints does not significantly hurt the prediction losses. Frame-wise self-reconstruction is significantly lower for the SPS models, but only by a small margin.

### A.3 SPS+

SPS can use physical symmetry to learn interpretable factors that evolve over time. We call those factors content representation. However, many problems can not be represented by content represen-

Table 3: Reconstruction and prediction results on the audio task.

| Methods                               | Self-recon ↓         | Image-pred ↓         | $\mathcal{L}_{\text{prior}} \downarrow$ |
|---------------------------------------|----------------------|----------------------|-----------------------------------------|
| SPS <sub>VAE</sub> , $K=4$ (Ours)     | <b>0.0375±0.0012</b> | <b>0.0377±0.0007</b> | <b>0.0057±0.0015</b>                    |
| SPS <sub>AE</sub> , $K=4$ (Ours)      | 0.0381±0.0012        | 0.0384±0.0009        | 0.0068±0.0031                           |
| SPS <sub>VAE</sub> , $K=0$ (Ablation) | 0.0384±0.0014        | 0.0388±0.0013        | 0.0134±0.0101                           |
| SPS <sub>AE</sub> , $K=0$ (Ablation)  | 0.0386±0.0012        | 0.0391±0.0012        | 0.0075±0.0024                           |
| $\beta$ -VAE                          | 0.0406±0.0008        | N/A                  | N/A                                     |

Table 4: Reconstruction and prediction losses of the video task. Two outliers are removed from the 50 runs.

| Method                                | Self-recon ↓           | Image-pred ↓          | $\mathcal{L}_{\text{prior}} \downarrow$ |
|---------------------------------------|------------------------|-----------------------|-----------------------------------------|
| SPS <sub>VAE</sub> , $K=4$ (Ours)     | 0.64382 ± 9e-05        | 0.6456 ± 4e-04        | 0.14 ± 0.05                             |
| SPS <sub>AE</sub> , $K=4$ (Ours)      | 0.64386 ± 7e-05        | 0.6458 ± 3e-04        | 0.17 ± 0.07                             |
| SPS <sub>VAE</sub> , $K=0$ (Ablation) | 0.64372 ± 4e-05        | 0.6459 ± 2e-04        | 0.19 ± 0.10                             |
| SPS <sub>AE</sub> , $K=0$ (Ablation)  | 0.64367 ± 5e-05        | <b>0.6456 ± 1e-04</b> | <b>0.11 ± 0.03</b>                      |
| $\beta$ -VAE                          | <b>0.64345 ± 5e-05</b> | N/A                   | N/A                                     |

458 tation alone. For example, the bouncing balls can have different colours and the pitch scales can be  
459 generated by different instruments. If the colour of a ball or the timbre of a sound scale are constant  
460 within a trajectory, those latent spaces are hard to constrain by physical symmetry. We call such  
461 invariant factors style representation. In order to deal with these problems, we combine SPS with a  
462 simple content-style disentanglement technique: SPS+, a more general framework of SPS. We use  
463 random pooling to constrain the style factors, and use physical symmetry to constrain the content  
464 representation in the same way as SPS in Section 3.1

### 465 A.3.1 Model

466 Figure 9 shows the design of SPS+, which belongs to the family of disentangled sequential autoen-  
467 coders [Bai *et al.*, 2021; Hsu *et al.*, 2017; Vowels *et al.*, 2021; Yingzhen and Mandt, 2018; Zhu *et*  
468 *al.*, 2020]. During the training process, the temporal data input  $\mathbf{x}_{1:T}$  is first fed into the encoder  $E$  to  
469 obtain the corresponding representation  $\mathbf{z}_{1:T}$ .  $\mathbf{z}_{1:T}$  is then split into two parts: the style factor  $\mathbf{z}_{1:T,s}$   
470 and the content factor  $\mathbf{z}_{1:T,c}$ . The style factor  $\mathbf{z}_{1:T,s}$  is passed through the random-pooling module  
471  $P$ , where one element  $z_{\tau,s}$  is randomly picked. The content factor  $\mathbf{z}_{1:T,c}$  is fed into *three* branches,  
472 then combined with  $z_{\tau,s}$  to reconstruct. For random pooling in the training stage, one style vector is  
473 randomly selected from all time steps (i.e., 15 for the music task and 20 for the vision task) of the  
474 sequence to represent  $z_s$ . In the testing stage, only the first 5 (vision task) or 3 (music task) frames  
475 are given, and  $z_s$  will be selected from them.

### 476 A.3.2 Training objective

477 The following loss functions in SPS+ slightly vary from those in SPS. For SPS+,  $\mathcal{L}_{\text{prior}}$  and  $\mathcal{L}_{\text{sym}}$   
478 work on the content part of latent variables only. Other loss functions are exactly the same as those  
479 defined in section 3.2

$$\mathcal{L}_{\text{prior}} = \ell_2(\hat{\mathbf{z}}_{2:T,c}, \mathbf{z}_{2:T,c}), \quad (8)$$

$$\mathcal{L}_{\text{sym}} = \ell_2(\tilde{\mathbf{z}}_{2:T,c}, \hat{\mathbf{z}}_{2:T,c}) + \ell_2(\tilde{\mathbf{z}}_{2:T,c}, \mathbf{z}_{2:T,c}). \quad (9)$$

$$\ell_2(\tilde{\mathbf{z}}_{2:T,c}, \mathbf{z}_{2:T,c}) = \frac{1}{K} \sum_{k=1}^K \ell_2(S_k^{-1}(R(S_k(\mathbf{z}_{1:T-1,c}))), \mathbf{z}_{2:T,c}), \quad (10)$$

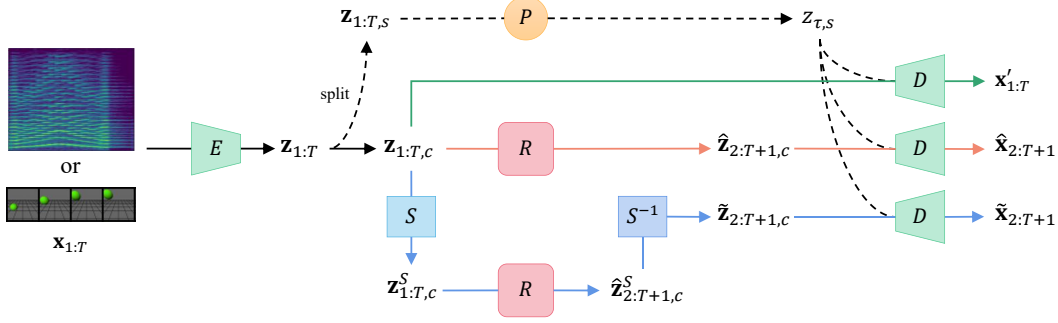

Figure 9: An overview of our model.  $\mathbf{x}_{1:T}$  is fed into the encoder  $E$  to obtain the corresponding representation  $\mathbf{z}_{1:T}$ , which is then split into two parts: the style factor  $\mathbf{z}_{1:T,s}$  and the content factor  $\mathbf{z}_{1:T,c}$ . The style factor is passed through the random-pooling layer  $P$ , where an element  $z_{\tau,s}$  is randomly selected. The content factor is fed into three different branches and combined with  $z_{\tau,s}$  to reconstruct three outputs respectively:  $\mathbf{x}'_{1:T}$ ,  $\hat{\mathbf{x}}_{2:T+1}$  and  $\tilde{\mathbf{x}}_{2:T+1}$ . Here,  $R$  is the prior model and  $S$  is the symmetric operation. The inductive bias of physical symmetry enforces  $R$  to be equivariant w.r.t. to  $S$ , so  $\tilde{\mathbf{z}}$  and  $\hat{\mathbf{z}}$  should be close to each other and so are  $\tilde{\mathbf{x}}$  and  $\hat{\mathbf{x}}$ .

$$\ell_2(\tilde{\mathbf{z}}_{2:T,c}, \hat{\mathbf{z}}_{2:T,c}) = \frac{1}{K} \sum_{k=1}^K \ell_2(S_k^{-1}(R(S_k(\mathbf{z}_{1:T-1,c}))), \hat{\mathbf{z}}_{2:T,c}), \quad (11)$$

$$\mathcal{L}_{\text{BCE}}(\tilde{\mathbf{x}}_{2:T}, \mathbf{x}_{2:T}) = \frac{1}{K} \sum_{k=1}^K \mathcal{L}_{\text{BCE}}(D(S_k^{-1}(R(S_k(\mathbf{z}_{1:T-1,c}))), z_{\tau,s}), \mathbf{x}_{2:T}). \quad (12)$$

#### 481 A.4 SPS+ on learning pitch & timber factors from audios of multiple instruments

##### 482 A.4.1 Dataset and setups

483 We synthesise a dataset that contains around 2400 audio clips played by **multiple instruments**.  
 484 Similar to the dataset in section 4.1.1, each clip contains 15 notes in major scales with the first 8  
 485 notes ascending and the last 8 notes descending. Each note has the same volume and duration. The  
 486 interval between every two notes is equal. We vary the starting pitch such that every MIDI pitch in the  
 487 range C2 to C7 is present in the dataset. For each note sequence, we synthesise it using 53 different  
 488 instruments, yielding 2376 audio clips. Specifically, two soundfonts are used to render those audio  
 489 clips respectively: FluidR3\_GM [Wen, 2013] for the train set and GeneralUser GS v1.471 [Chris,  
 490 2017] for the test set. The pitch ranges for different instruments vary, so we limit each instrument to  
 491 its common pitch range (See Table 14).

492 We assume  $z_c \in \mathcal{R}$  and  $z_s \in \mathcal{R}^2$ , and use random  $S \in G \cong (\mathbb{R}, +)$  to augment  $z_c$  with  $K=4$ .

##### 493 A.4.2 Results on pitch-timbre disentanglement

494 We evaluate the content-style disentanglement using factor-wise data augmentation following [Yang *et*  
 495 *al.*, 2019]. Namely, we change (i.e., augment) the instrument (i.e., style) of notes while keeping their  
 496 pitch the same, and then measure the effects on the encoded  $z_c$  and  $z_s$ . We compare the normalised  
 497  $z_c$  and  $z_s$ , ensuring they have the same dynamic range. Ideally, the change of  $z_s$  should be much  
 498 more significant than  $z_c$ . Here, we compare four approaches: 1) our model (SPS+), 2) our model  
 499 without splitting for  $z_s$  (SPS with  $z \in \mathcal{R}^3$  and  $S \in G \cong (\mathbb{R}, +)$ ) as an ablation, 3) GMVAE [Luo *et*  
 500 *al.*, 2019], a domain-specific pitch-timbre disentanglement model trained with *explicit pitch labels*,  
 501 and 4) TS-DSAE [Luo *et al.*, 2022], a recent unsupervised pitch-timbre disentanglement model based  
 502 on Disentangled Sequential Autoencoder (DSAE).

503 Figure 10 presents the changes in normalised  $z_c$  and  $z_s$  measured by L2 distance when we change  
 504 the instrument of an anchor note whose pitch is D3 and synthesised by accordion. Table 5 provides  
 505 a more quantitative version by aggregating all possible instrument combinations and all different

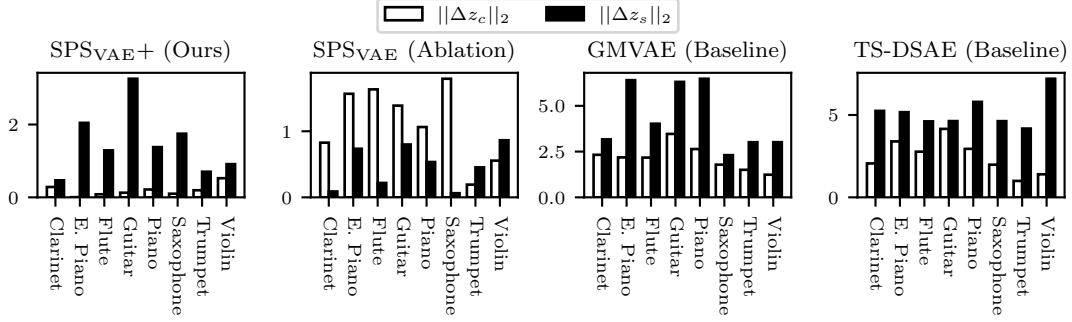

Figure 10: Comparisons for  $\Delta z_c$  and  $\Delta z_s$  for different instruments against accordion, with pitch kept constant at MIDI pitch D3.  $\Delta z_c$  and  $\Delta z_s$  are changes in normalised  $z_c$  and  $z_s$ , so that higher black bars relative to white bars means better results. All results are evaluated on the test set.

Table 5: Mean ratios of changes in normalised  $z_c$  and  $z_s$  under timbre augmentation across all possible instrument combinations under different constant pitches in the test set.

| Methods            | $\ \Delta z_c\ _2 / \ \Delta z_s\ _2 \downarrow$ |
|--------------------|--------------------------------------------------|
| SPS_VAE+ (Ours)    | <b>0.49</b>                                      |
| SPS_VAE (Ablation) | 2.20                                             |
| GMVAE (Baseline)   | 0.67                                             |
| TS-DSAE (Baseline) | 0.65                                             |

506 pitch pairs. Both results show that SPS+ produces a smaller relative change in  $z_c$  under timbre  
507 augmentation, demonstrating a successful pitch-timbre disentanglement outperforming both the  
508 ablation and baseline. Note that for the ablation model,  $z_c$  varies heavily under timbre augmentation,  
509 seemingly containing timbre information. This result indicates that the design of an invariant style  
510 factor over the temporal flow is necessary to achieve good disentanglement.

511 We further quantify the results in the form of augmentation-based queries following [Yang *et al.*, 2019],  
512 regarding the intended split in  $z$  as ground truth and the dimensions with the largest variances from  
513 factor-wise augmentation after normalisation as predictions. For example, under timbre augmentation  
514 under a given pitch for our model, if  $z_1$  and  $z_3$  are the two dimensions of  $z$  that produce the largest  
515 variances after normalisation, we count one false positive ( $z_1$ ), one false negative ( $z_2$ ), and one true  
516 positive ( $z_3$ ). The precision would be 0.67. Tables 6 shows the precision scores of the four approaches  
517 against their corresponding random selection. The results are in line with our observation in the  
518 previous evaluation, with our model more likely to produce the largest changes in dimensions in  $z_c$   
519 under content augmentation and that in  $z_s$  under style augmentation.

Table 6: Results on augmentation-based queries on the audio task. Precision, recall and F1 are the same since the number of predicted and ground-truth positives are identical. Note that random precisions for different approaches can be different as  $z_c$  and  $z_s$  are split differently.

| Methods            | Timbre augmentation  |        | Pitch augmentation   |        |
|--------------------|----------------------|--------|----------------------|--------|
|                    | Precision $\uparrow$ | Random | Precision $\uparrow$ | Random |
| SPS_VAE+ (Ours)    | <b>0.98</b>          | 0.67   | 0.82                 | 0.33   |
| SPS_VAE (Ablation) | 0.50                 | 0.67   | 0.02                 | 0.33   |
| GMVAE (Baseline)   | 0.93                 | 0.50   | <b>0.83</b>          | 0.50   |
| TS-DSAE (Baseline) | 0.81                 | 0.50   | 0.68                 | 0.50   |

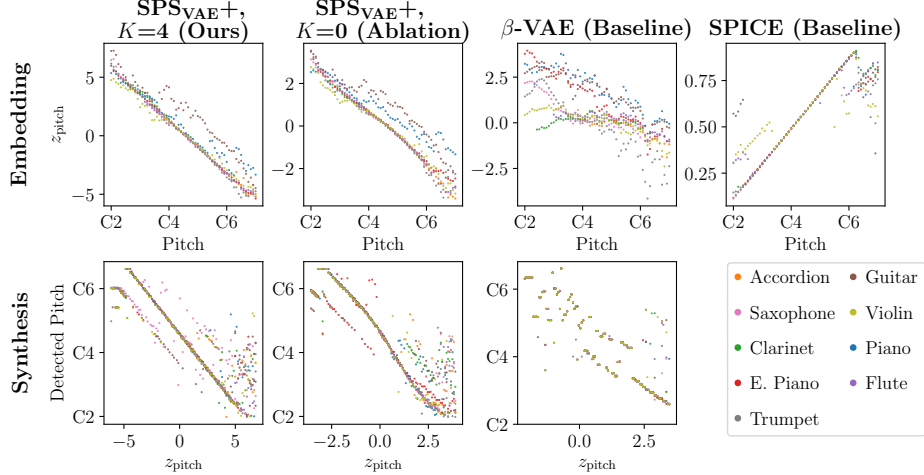

Figure 11: A visualisation of the mapping between the 1D content factor and the true pitch. In the upper row, models encode notes in the test set to  $z_{\text{pitch}}$ . The  $x$  axis shows the true pitch and the  $y$  axis shows the learned pitch factor. In the lower row, the  $x$  axis traverses the  $z_{\text{pitch}}$  space. The models decode  $z_{\text{pitch}}$  to audio clips. We apply YIN to the audio clips to detect the pitch, which is shown by the  $y$  axis. In both rows, a linear, noiseless mapping is ideal, and our method performs the best.

Table 7: Reconstruction and prediction results on the audio task.

| Methods                                | Self-recon $\downarrow$ | Image-pred $\downarrow$ | $\mathcal{L}_{\text{prior}} \downarrow$ |
|----------------------------------------|-------------------------|-------------------------|-----------------------------------------|
| SPS <sub>VAE+</sub> , $K=4$ (Ours)     | <b>0.0356</b>           | <b>0.0359</b>           | <b>0.0418</b>                           |
| SPS <sub>VAE+</sub> , $K=0$ (Ablation) | 0.0360                  | 0.0363                  | 0.0486                                  |
| $\beta$ -VAE (Baseline)                | 0.0359                  | N/A                     | N/A                                     |

#### 520 A.4.3 Results on interpretable pitch space

521 Figure 11 shows that the pitch factor learned by SPS+ has a linear relation with the true pitch. Here,  
522 we use  $z_{\text{pitch}}$  as the synonym of  $z_c$  to denote the content factor. The plot shows the mappings of two  
523 tasks and four models. In the embedding task (the first row),  $x$ -axis is the true pitch and  $y$ -axis is  
524 embedded  $z_{\text{pitch}}$ . In the synthesis task (the second row),  $x$ -axis is  $z_{\text{pitch}}$  and  $y$ -axis is the detected  
525 pitch (by YIN algorithm, a standard pitch-estimation method by [De Cheveigné and Kawahara, 2002])  
526 of decoded (synthesised) notes. The four models involved are: 1) our model, 2) our model without  
527 symmetry ( $K=0$ ), 3) a  $\beta$ -VAE trained to encode single-note spectrograms from a single instrument  
528 (banjo) to 1D embeddings, and 4) SPICE [Gfeller *et al.*, 2020], a SOTA unsupervised pitch estimator  
529 *with strong domain knowledge on how pitch linearity is reflected in log-frequency spectrograms*. As  
530 the figure shows, without explicit knowledge of pitch, our model learns a more interpretable pitch  
531 factor than  $\beta$ -VAE, and the result is comparable to SPICE.

532 Figure 12 shows a more quantitative analysis, using  $R^2$  as the metric to evaluate the linearity of  
533 the pitch against  $z_{\text{pitch}}$  mapping. Although SPICE produces rather linear mappings in Figure 11, it  
534 suffers from octave errors towards extreme pitches, hurting its  $R^2$  performance.

#### 535 A.4.4 Reconstruction and prior prediction

536 We investigate the reconstruction and prediction capacities of our model and show that they are not  
537 harmed by adding symmetry constraints. We compare our model, our model ablating symmetry  
538 constraints, and a  $\beta$ -VAE trained solely for only image reconstruction. Table 7 reports per-pixel  
539 BCE of the reconstructed sequences from the original input frames (Self-recon) and from the RNN  
540 predictions (Image-pred). We also include  $\mathcal{L}_{\text{prior}}$ , the MSE loss on the RNN-predicted  $\hat{z}$  as redefined  
541 in section A.3.2. The results show that our model surpasses the ablation and baseline models in all  
542 three indexes.

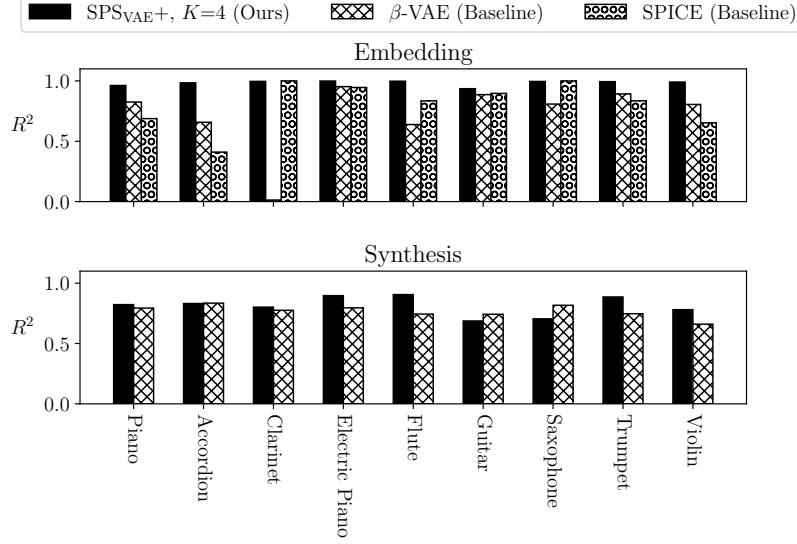

Figure 12: We use  $R^2$  to evaluate mapping linearity. A larger  $R^2$  indicates a more interpretable latent space. Results are evaluated on the test set.

## 543 A.5 SPS+ on learning space & colour factors from videos of colourful bouncing balls

### 544 A.5.1 Dataset and setups

545 We run physical simulations of a bouncing ball in a 3D space and generate 4096 trajectories, yielding  
 546 a dataset of videos. Similar to the dataset in section 4.2.1, the simulated ball is affected by gravity and  
 547 bouncing force (elastic force). A fixed camera records a 20-frame video of each 4-second simulation  
 548 to obtain one trajectory (see Figure 13). The ball’s size, gravity, and proportion of energy loss per  
 549 bounce are constant across all trajectories. In this dataset, the color of the ball varies by trajectory,  
 550 rather than a single color. For each trajectory, the ball’s colours are uniformly randomly sampled  
 551 from a continuous colour space.

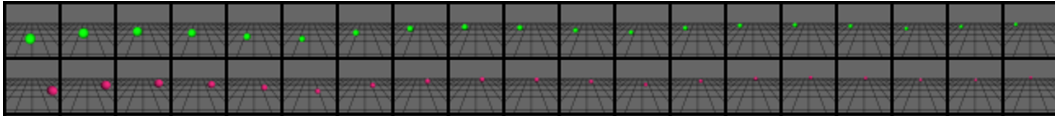

Figure 13: Two example trajectories from the bouncing ball dataset.

552 We set  $z_c \in \mathcal{R}^3$  with the same representation augmentation as in section 4.2 ( $S \in G \cong (\mathbb{R}^2, +) \times$   
 553  $SO(2)$ ,  $K=4$ ). Two of its dimensions are intended to span the horizontal plane and the third  
 554 unaugmented latent dimension is intended to encode the vertical height. We set  $z_s \in \mathcal{R}^2$  which is  
 555 intended to represent the ball’s colour space.

### 556 A.5.2 Result on space-colour disentanglement

557 Similar to section A.4.2, we evaluate the space-colour disentanglement by augmenting the colour  
 558 (i.e., style) of the bouncing balls while keeping their locations, and then measure the effects on the  
 559 normalised  $z_c$  and  $z_s$ . Again, a good disentanglement should lead to a change in  $z_s$  much more  
 560 significant than  $z_c$ . Here, we compare two approaches: 1) our model (SPS+) and 2) our model  
 561 ablating splitting for  $z_s$  (SPS with  $z \in \mathcal{R}^5$  and  $S \in G \cong (\mathbb{R}^2, +) \times SO(2)$ ). Note that the ablation  
 562 model does not differently constrain  $z_2$  (corresponding to the  $y$ -axis) than  $z_s$ . To ensure a meaningful  
 563 comparison, under colour augmentation, we consider  $z_2$  to be a part of  $z_s$  of the ablation model and a  
 564 part of  $z_c$  of the complete model.

565 Figure 14 presents the changes in normalised  $z_c$  and  $z_s$  measured by L2 distance when we change  
 566 the colour of an anchor ball whose location is (0, 1, 5) and rendered using white colour. Table 9

Table 8: Results on augmentation-based queries on the visual task. Since the ablation model does not differently constrain  $z_2$  (corresponding to the  $y$ -axis) than  $z_s$ , we consider  $z_c$  and  $z_s$  differently for the two approaches. Under colour augmentation, we consider  $z_2$  to be a part of  $z_s$  for the ablation model and a part of  $z_c$  for the complete model. Under location augmentation, we consider  $z_2$  to be a part of  $z_c$  for both models.

| Methods                       | Colour augmentation  |        | Location augmentation |        |
|-------------------------------|----------------------|--------|-----------------------|--------|
|                               | Precision $\uparrow$ | Random | Precision $\uparrow$  | Random |
| SPS <sub>VAE</sub> + (Ours)   | <b>0.99</b>          | 0.40   | <b>0.88</b>           | 0.40   |
| SPS <sub>VAE</sub> (Ablation) | 0.64                 | 0.60   | 0.36                  | 0.40   |

Table 9: Mean ratios of changes in normalised  $z_c$  and  $z_s$  under colour augmentation across sampled colour combinations keeping locations constant. Results are evaluated on the test set.

| Methods                       | $\ \Delta z_c\ _2 / \ \Delta z_s\ _2 \downarrow$ |
|-------------------------------|--------------------------------------------------|
| SPS <sub>VAE</sub> + (Ours)   | <b>0.54</b>                                      |
| SPS <sub>VAE</sub> (Ablation) | 1.62                                             |

567 provides a more quantitative version by aggregating sampled colour combinations and location pairs.  
568 Both results show that our model produces a smaller relative change in  $z_c$  under timbre augmentation,  
569 demonstrating a successful pitch-timbre disentanglement outperforming the ablation model. Note  
570 that for the ablation model,  $z_c$  varies heavily under colour augmentation. Table 8 shows the precision  
571 scores of the SPS+ and its ablation against their corresponding random selection for the ball task.  
572 These results agree with section A.4.2 and again indicate that the design of an invariant style factor  
573 helps with disentanglement.

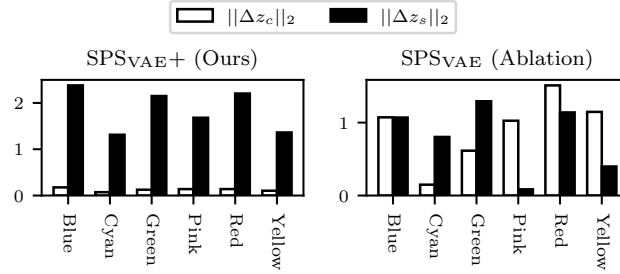

Figure 14: Comparisons of normalised  $\Delta z_c$  and  $\Delta z_s$  for different colours against white, with the ball's location kept constant at (0, 1, 5). Higher black bars (relative white bars) means better a result. (Results are evaluated on the test set.)

574 Figure 15 evaluates the learned colour factor of our model. Each pixel shows the colour of the ball  
575 synthesised by the decoder using different  $z$  coordinates. The ball colour is detected using naive  
576 saturation maxima. In the central subplot, the location factor  $z_{1:3}$  stays at zeros while the colour  
577 factor  $z_{4:5}$  is controlled by the subplot's  $x, y$  axes. As shown in the central subplot, our model (a)  
578 learns a natural 2D colour space. The surrounding subplots keep the colour factor  $z_{4:5}$  unchanged,  
579 and the location factor  $z_{1:3}$  is controlled by the subplot's  $x, y$  axes. A black cross marks the point  
580 where the entire  $z_{1:5}$  is equal to the corresponding black cross in the central subplot. As is shown  
581 by the surrounding subplots, varying the location factor does not affect the colour produced by our  
582 model (a), so the disentanglement is successful. The luminosity changes because the scene is lit by a  
583 point light source, making the ball location affect the surface shadow. On the other hand,  $\beta$ -VAE (b)  
584 learns an uninterpretable colour factor.

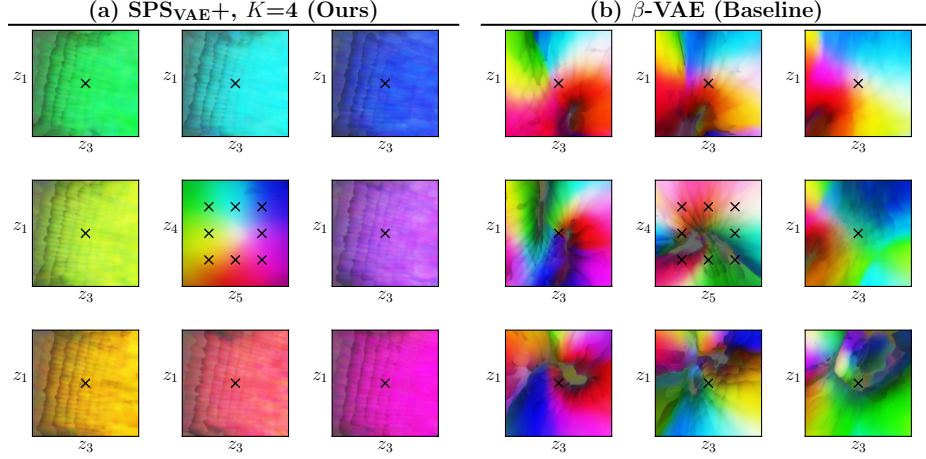

Figure 15: The colour map of the synthesised ball experiment through latent space traversal. Each pixel represents the detected colour from one synthesised image of the ball. Each subplot varies two dimensions of  $z$ , showing how the synthesised colour responds to the controlled  $z$ .

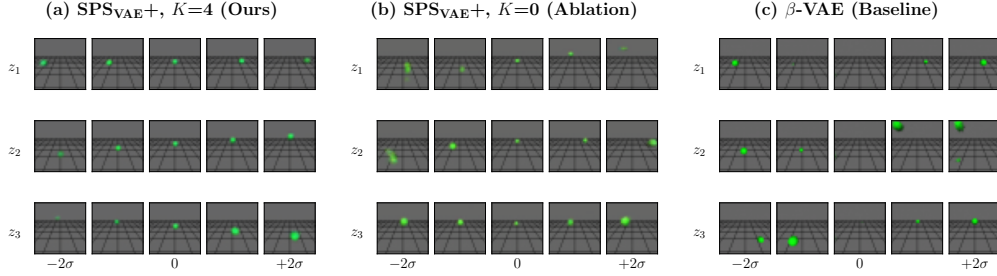

Figure 16: Row  $i$  shows the generated images when changing  $z_i$  and keeping  $z_{j \neq i} = 0$ , where the  $x$  axis varies  $z_i$  from  $-2\sigma$  to  $+2\sigma$ . In (a), changing  $z_2$  controls the ball’s height, and changing  $z_1, z_3$  moves the ball parallel to the ground plane.

### 585 A.5.3 Results on interpretable 3D representation

586 Figure 16 illustrates the interpretability of learned content factor using latent space traversal. Each  
 587 row varies only one dimension of the learned 3D content factor, keeping the other two dimensions at  
 588 zero. Figure 16(a) shows the results of our model. We clearly observe that: i) *increasing  $z_1$  (the first  
 589 dimension of  $z_c$ ) mostly moves the ball from left to right, increasing  $z_2$  moves the ball from bottom  
 590 to top, and increasing  $z_3$  mostly moves the ball from far to near. Figure 16(b) is the ablation model  
 591 without physical symmetry, and (c) shows the result of our baseline model  $\beta$ -VAE, which is trained to  
 592 reconstruct static images of a single colour (green). Neither (b) nor (c) learns an interpretable latent  
 593 space.*

Table 10: Linear fits between the true location and the learned location factor. We run the encoder on the test set to obtain data pairs in the form of (location factor, true coordinates). We then run a linear fit on the data pairs to evaluate factor interpretability.

| Method                                 | $x$ axis MSE $\downarrow$ | $y$ axis MSE $\downarrow$ | $z$ axis MSE $\downarrow$ | MSE $\downarrow$ |
|----------------------------------------|---------------------------|---------------------------|---------------------------|------------------|
| SPS <sub>VAE+</sub> , $K=4$ (Ours)     | <b>0.11</b>               | <b>0.06</b>               | <b>0.09</b>               | <b>0.09</b>      |
| SPS <sub>VAE+</sub> , $K=0$ (Ablation) | 0.35                      | 0.72                      | 0.68                      | 0.58             |
| $\beta$ -VAE (Baseline)                | 0.37                      | 0.76                      | 0.73                      | 0.62             |



Table 11: Reconstruction and prediction results on the video task with variable colours.

| Method                                 | Self-recon ↓  | Image-pred ↓  | $\mathcal{L}_{\text{prior}}$ ↓ |
|----------------------------------------|---------------|---------------|--------------------------------|
| SPS <sub>VAE</sub> +, $K=4$ (Ours)     | 0.6457        | <b>0.6464</b> | <b>0.0957</b>                  |
| SPS <sub>VAE</sub> +, $K=0$ (Ablation) | 0.6456        | <b>0.6464</b> | 0.1320                         |
| $\beta$ -VAE (Baseline)                | <b>0.6455</b> | N/A           | N/A                            |

Table 12:  $R^2$  aggregated across all instruments in the test set. A larger  $R^2$  indicates a more interpretable latent space.

| Method                                 | Self-recon ↓  | Image-pred ↓  | $\mathcal{L}_{\text{prior}}$ ↓ | Embedding $R^2$ ↑ | Synthesis $R^2$ ↑ |
|----------------------------------------|---------------|---------------|--------------------------------|-------------------|-------------------|
| SPS <sub>VAE</sub> +, $K=4$ (Ours)     | 0.0384        | <b>0.0396</b> | <b>0.7828</b>                  | <b>0.89</b>       | <b>0.47</b>       |
| SPS <sub>VAE</sub> +, $K=0$ (Ablation) | 0.0388        | 0.0400        | 0.9909                         | 0.83              | 0.25              |
| $\beta$ -VAE (Baseline)                | <b>0.0324</b> | N/A           | N/A                            | 0.19              | 0.29              |

Table 10 quantitatively evaluates the linearity of the learned location factor. We fit a linear regression from  $z_c$  to the true 3D location over the test set and then compute the Mean Square Errors (MSEs). A smaller MSE indicates a better fit. All three methods (as used in Figure 16) are evaluated on a single-colour (green) test set. Results show that our model achieves the best linearity in the learned latent factors, which aligns with our observations in Figure 16.

#### A.5.4 Reconstruction and prior prediction

Similar to section A.4.4, we show that our model suffers little decrease in reconstruction and prediction performance while surpassing the ablation model in terms of  $\mathcal{L}_{\text{prior}}$  by table 11.

### A.6 More complicated tasks

The main part of this paper focuses on simple, straight-forward experiments. Still, we supplement our findings by reporting our current implementation’s performance on more complicated tasks involving natural melody and real-world video data.

#### A.6.1 Learning interpretable pitch factors from natural melodies

We report the performance of SPS+ on learning interpretable pitch factors from monophonic melodies under a more realistic setup. We utilize the melodies from the Nottingham Dataset [Foxley, 2011], a collection of 1200 American and British folk songs. For simplicity, we quantise the MIDI melodies by eighth notes, replace rests with sustains and break down sustains into individual notes. We synthesise each non-overlapping 4-bar segment with the accordion soundfonts in FluidR3 GM [Wen, 2013], resulting in around 5000 audio clips, each of 64 steps.

This task is more realistic than the audio task described in A.4 since we use a large set of natural melodies instead of one specified melody line. The task is also more challenging as the prior model has to predict long and more complex melodies. To account for this challenge, we use a GRU [Cho *et al.*, 2014] with 2 layers of 512 hidden units as the prior model. We perform early-stopping after around 9000 iterations based on spectrogram reconstruction loss on the training set. The model and training setup is otherwise the same as in A.4.

Following A.4.3, We evaluate our approach on notes synthesised with all instruments in GeneralUser GS v1.471 [Chris, 2017] in the MIDI pitch range of C4 to C6, where most of the melodies in Foxley [2011] take place. Note that this is a challenging zero-shot scenario since the model is trained on only one instrument. We compare our model, our model ablating the symmetry loss and a  $\beta$ -VAE baseline. We visualise the embedded  $z_{\text{pitch}}$  and synthesised pitches for different instruments in Figure 17. Following 12,  $R^2$  results are shown in Figure 18 and Table 12. Even when tested on unseen timbres, our model can learn linear and interpretable pitch factors and demonstrates better embedding and synthesis performance compared with the ablation model, which outperforms the  $\beta$ -VAE baseline.

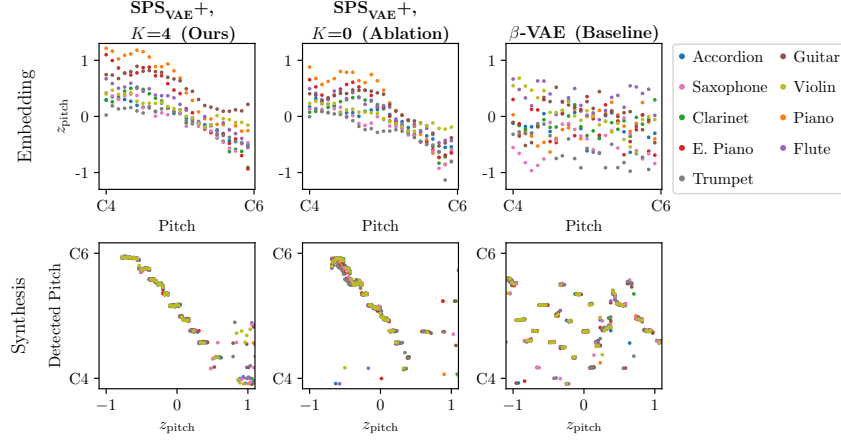

Figure 17: A visualisation of the mapping between the embedded 1D content factor and the true pitch for the model trained on Nottingham dataset.

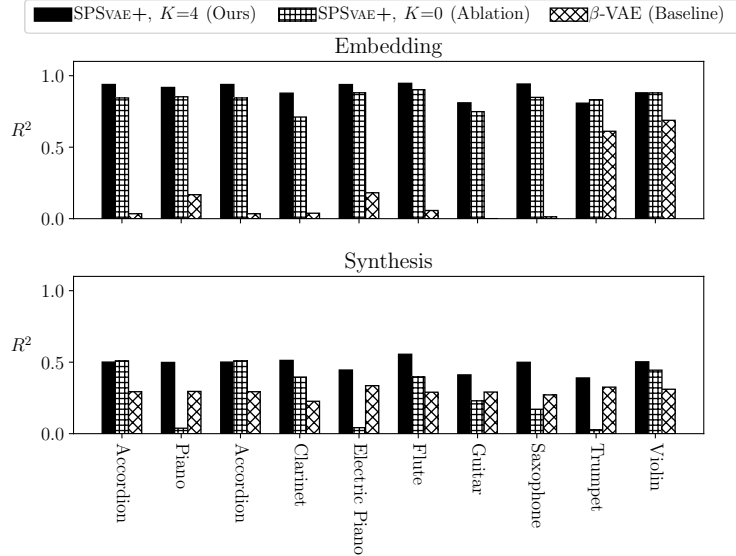

Figure 18:  $R^2$  for select instruments in the test set. A larger  $R^2$  indicates a more linear and interpretable latent space.

## 627 A.6.2 Learning an interpretable location factor from KITTI-Masks

628 In this task, we evaluate our method’s capability on a real-world dataset, KITTI-Masks [Klindt *et al.*,  
629 2021]. The dataset provides three labels for each image:  $X$  and  $Y$  for the mask’s 2D coordinate, and  
630  $AR$  for the pixel-wise area of the mask. Based on the provided labels, we use simple geometrical  
631 relation to estimate the person-to-camera distance  $d$ , computed as  $d = 1 / \tan(\alpha\sqrt{AR})$ , where  $\alpha$  is a  
632 constant describing the typical camera’s Field of View (FoV).

633 We use a 3-dimensional latent code for all models. For SPS, all 3 dimensions are content factors  $z_c$   
634 and no style factor  $z_s$  is used. We apply group assumption  $(\mathbb{R}^3, +)$  to augment representations with  
635  $K = 1$ . To measure the interpretability, we fit a linear regression from  $z_c$  to the ground truth labels  
636 and calculate MSEs in the same way as in section A.5.3. The results are shown in Table 13. Linear  
637 proj. MSE 1 measures the errors of linear regression from  $z_c$  to the original dataset labels. Linear  
638 proj. MSE 2 measures the errors of linear regression from  $z_c$  to the person’s 3-D location, estimated  
639 from the labels.

Table 13: Results of KITTI-Masks task, averaging on 30 random initialisations for each method.

| Methods                               | Self-recon ↓       | Image-pred ↓       | Linear proj. MSE 1 ↓ | Linear proj. MSE 2 ↓ |
|---------------------------------------|--------------------|--------------------|----------------------|----------------------|
| SPS <sub>VAE</sub> , $K=4$ (Ours)     | 0.030±0.001        | <b>0.084±0.006</b> | <b>0.215±0.067</b>   | <b>0.203±0.065</b>   |
| SPS <sub>VAE</sub> , $K=0$ (Ablation) | 0.030±0.001        | 0.093±0.010        | 0.235±0.077          | 0.243±0.088          |
| $\beta$ -VAE (Baseline)               | <b>0.028±0.001</b> | N/A                | 0.403±0.194          | 0.399±0.204          |

As is shown in Table 13, MSE 2 is smaller than MSE 1 for SPS, indicating that SPS learns more fundamental factors (person’s location) rather than superficial features (pixel-wise location and area). For the baseline methods, MSE 2 is almost equal to MSE 1, and both of them are higher than those of SPS. In summary, our experiment shows that SPS learns more interpretable representations than the baseline (as well as the ablation method) on KITTI-Masks dataset.

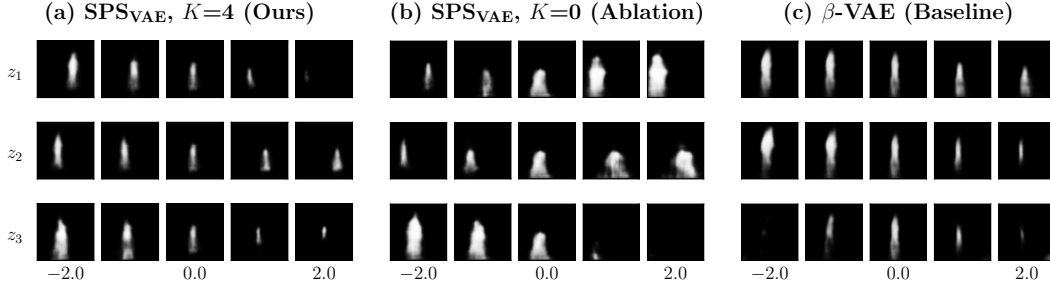

Figure 19: Latent space traversal on different models. Row  $i$  shows the generated images when changing  $z_i$  and keeping  $z_{\neq i} = 0$ . For our model, the range of  $z_1$  from -2 to 2 corresponds to the human location from near-right to far-left,  $z_2$  from near-left to far-right, and  $z_3$  from near to far. We can see that other methods produce more non-linear trajectories, for example in (c), the human location hardly changes when  $z_1 < 0$ , but it changes dramatically when  $z_1 > 0$ .

Figure 19 shows the generated images, which illustrates that the factors learned by SPS are more linear than those learned by other methods in the human location attribute. For the experiment, We choose all sequences with length  $\geq 12$  from KITTI-Masks as our dataset; we use 1058 sequences for training and 320 sequences for evaluation; In the inference stage, only the first 4 frames are given. All three methods are trained 30 times with different random initializations. Table 13 shows the average results evaluated on the same test set with 30 different seeds.

## A.7 Reproducibility statement and compute requirement

The source code for training and testing the models, as well as generating the figures and tables, is publicly available at <https://github.com/double-blind-75098/Learning-basic-interpretable-factors-from-temporal-signals-via-physical-symmetry>.

The GTX1080Ti graphics card is capable of effectively executing all the tasks presented in this paper.

| Instrument         | MIDI Note<br>(from) | MIDI Note<br>(to) |
|--------------------|---------------------|-------------------|
| Accordion          | 58                  | 96                |
| Acoustic Bass      | 48                  | 96                |
| Banjo              | 36                  | 96                |
| Baritone Saxophone | 36                  | 72                |
| Bassoon            | 36                  | 84                |
| Celesta            | 36                  | 96                |
| Church Bells       | 36                  | 96                |
| Clarinet           | 41                  | 84                |
| Clavichord         | 36                  | 84                |
| Dulcimer           | 36                  | 84                |
| Electric Bass      | 40                  | 84                |
| Electric Guitar    | 36                  | 96                |
| Electric Organ     | 36                  | 96                |
| Electric Piano     | 36                  | 96                |
| English Horn       | 36                  | 85                |
| Flute              | 48                  | 96                |
| Fretless Bass      | 36                  | 84                |
| Glockenspiel       | 36                  | 96                |
| Guitar             | 36                  | 96                |
| Harmonica          | 36                  | 96                |
| Harp               | 36                  | 96                |
| Harpsichord        | 36                  | 96                |
| Horn               | 36                  | 96                |
| Kalimba            | 36                  | 96                |
| Koto               | 36                  | 96                |
| Mandolin           | 36                  | 96                |
| Marimba            | 36                  | 96                |
| Oboe               | 36                  | 96                |
| Ocarina            | 36                  | 96                |
| Organ              | 36                  | 96                |
| Pan Flute          | 36                  | 96                |
| Piano              | 36                  | 96                |
| Piccolo            | 48                  | 96                |
| Recorder           | 36                  | 96                |
| Reed Organ         | 36                  | 96                |
| Sampler            | 36                  | 96                |
| Saxophone          | 36                  | 84                |
| Shakuhachi         | 36                  | 96                |
| Shamisen           | 36                  | 96                |
| Shehnai            | 36                  | 96                |
| Sitar              | 36                  | 96                |
| Soprano Saxophone  | 36                  | 96                |
| Steel Drum         | 36                  | 96                |
| Timpani            | 36                  | 96                |
| Trombone           | 36                  | 96                |
| Trumpet            | 36                  | 96                |
| Tuba               | 36                  | 72                |
| Vibraphone         | 36                  | 96                |
| Viola              | 36                  | 96                |
| Violin             | 36                  | 96                |
| Violoncello        | 36                  | 96                |
| Whistle            | 48                  | 96                |
| Xylophone          | 36                  | 96                |

Table 14: Pitch range (in MIDI note) for each instrument in our dataset.
